# Supplementary material
Source: publisher figshare collection journal article supplement (https://acs.figshare.com/ndownloader/files/26636859)
Supplement: Supplementary file 1 [file 26636859]

## Supporting information

### **Novel proton exchange membrane with long-range acid-base-pair proton transfer pathway based on functionalized polyethyleneimine**

Henghui Huang<sup>a,c</sup>, Liwen Nia<sup>a,c</sup>, Shaoyi Xu<sup>a,b,c</sup>, Feiyan Luo<sup>a,c</sup>, Jiantao Fan<sup>\*a,b,c</sup>, Hui Li<sup>\*a,c</sup>,  
Haijiang Wang<sup>c,d</sup>

<sup>a</sup> Department of Materials Science and Engineering, Southern University of Science and Technology, 1088 Xueyuan Avenue, Nanshan District, Shenzhen 518055, Guangdong, China

<sup>b</sup> Academy for Advanced Interdisciplinary Studies, Southern University of Science and Technology, 1088 Xueyuan Avenue, Nanshan District, Shenzhen, 518055, China

<sup>c</sup> Guangdong Provincial Key Laboratory of Energy Materials for Electric Power, 1088 Xueyuan Avenue, Nanshan District, Shenzhen 518055, China

<sup>d</sup> Department of Mechanical and Energy Engineering, Southern University of Science and Technology, 1088 Xueyuan Avenue, Nanshan District, Shenzhen, 518055, China

Corresponding author: [fanjt@sustc.edu.cn](mailto:fanjt@sustc.edu.cn); [hui.li@sustc.edu.cn](mailto:hui.li@sustc.edu.cn)

Number of pages: 11

Number of figures: 6

Number of tables: 3

## Chemical Structure Characterization of PEIMPA

The Raman spectra were used to characterize the structure of PEIMPA. Fig. S1 show the Raman spectra of PEI, PEIMPA with 50% and 100% replacement rate, the peaks around  $960\text{cm}^{-1}$  and  $2940\text{cm}^{-1}$  (assigned to  $\nu(\text{-NH-}$  and  $\text{-NH}_2)$ ), the PEIMPA have a obviously weaker peak strength, indicating that part of  $\text{-NH}_2$  groups had been reacted and replaced. The peaks at  $657\text{cm}^{-1}$  and  $820\text{cm}^{-1}$  (assigned to  $\text{P-O}$ ) and the peak around  $1060\text{cm}^{-1}$  (assigned to  $\text{P=O}$ ) were appeared in PEIMPA molecular, indicating that  $\text{-PO}_3\text{H}_2$  groups were introduced into PEI. Therefore, part of the  $\text{-NH-}$  and  $\text{-NH}_2$  groups were functionalized as methylphosphonic acid ( $\text{-CH}_2\text{PO}_3\text{H}_2$ ).

Fig. S2 (a- d) illustrates  $^1\text{H}$  and  $^{13}\text{C}$  NMR spectrum of PEI and PEIMPA. Compared with the  $^1\text{H}$  NMR spectrum of PEI, the peaks at 3.5-4.0 ppm (assigned to  $\text{N-CH}_2\text{-PO}_3\text{H}_2$ ) appeared, and the peak at 2.5 ppm (assigned to  $\text{-CH}_2\text{-CH}_2\text{-NH-}$ ) were moved to around 2.9 ppm, implying that the  $\text{-NH}_2$  groups have been reacted with the  $\text{HCHO}$  and  $\text{H}_3\text{PO}_3$ , and new  $\text{N-C}$  bonds were generated. Moreover, the peaks at 57.1 and 58.7 ppm (assigned to  $\text{-CH}_2\text{-PO}_3\text{H}_2$ ) has appeared in  $^{13}\text{C}$  NMR spectrum of obtained PEIMPA, indicating that the  $\text{-PO}_3\text{H}_2$  were introduced. Therefore, the  $^1\text{H}$ NMR,  $^{13}\text{C}$  NMR and Raman spectra demonstrated the reaction between  $\text{-NH}_2$ ,  $\text{HCHO}$  and  $\text{H}_3\text{PO}_3$  is successful and the prepared PEIMPA was obtained.

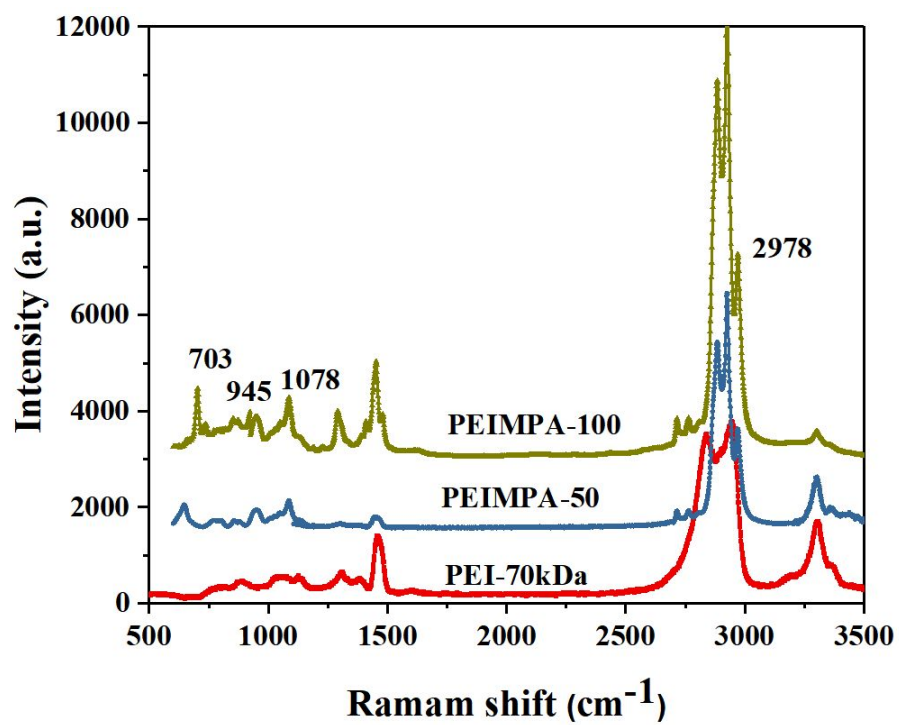

Fig.S1 Raman spectra of the PEI and PEIMPA with 50% and 100% replacement rate

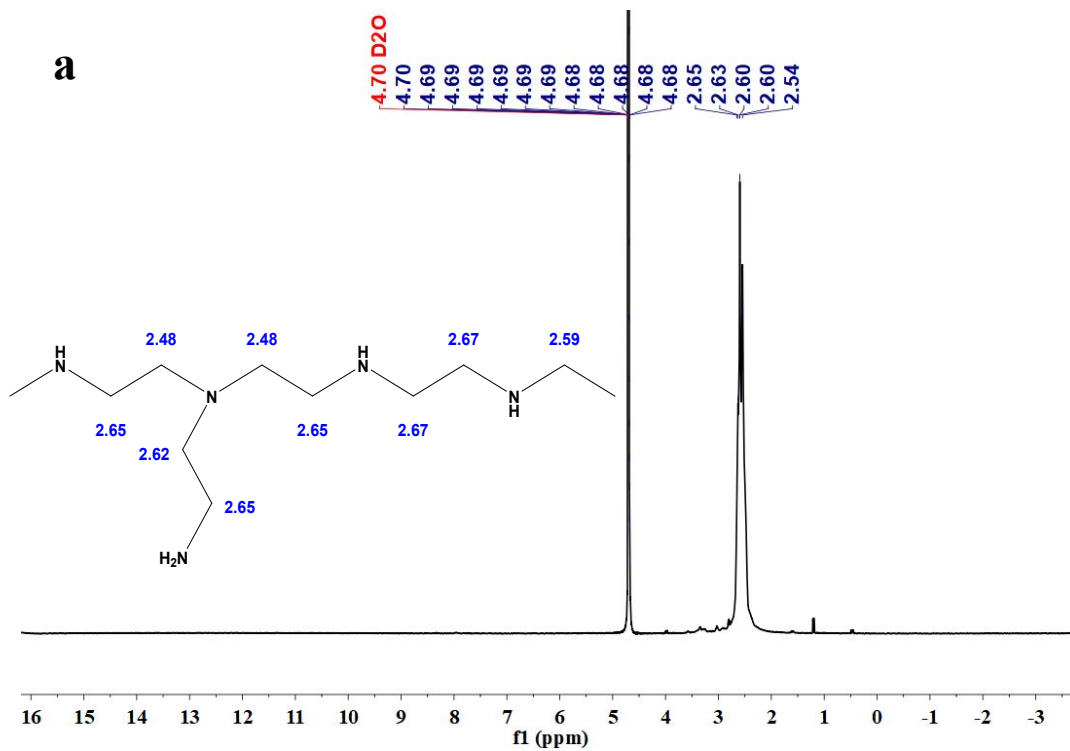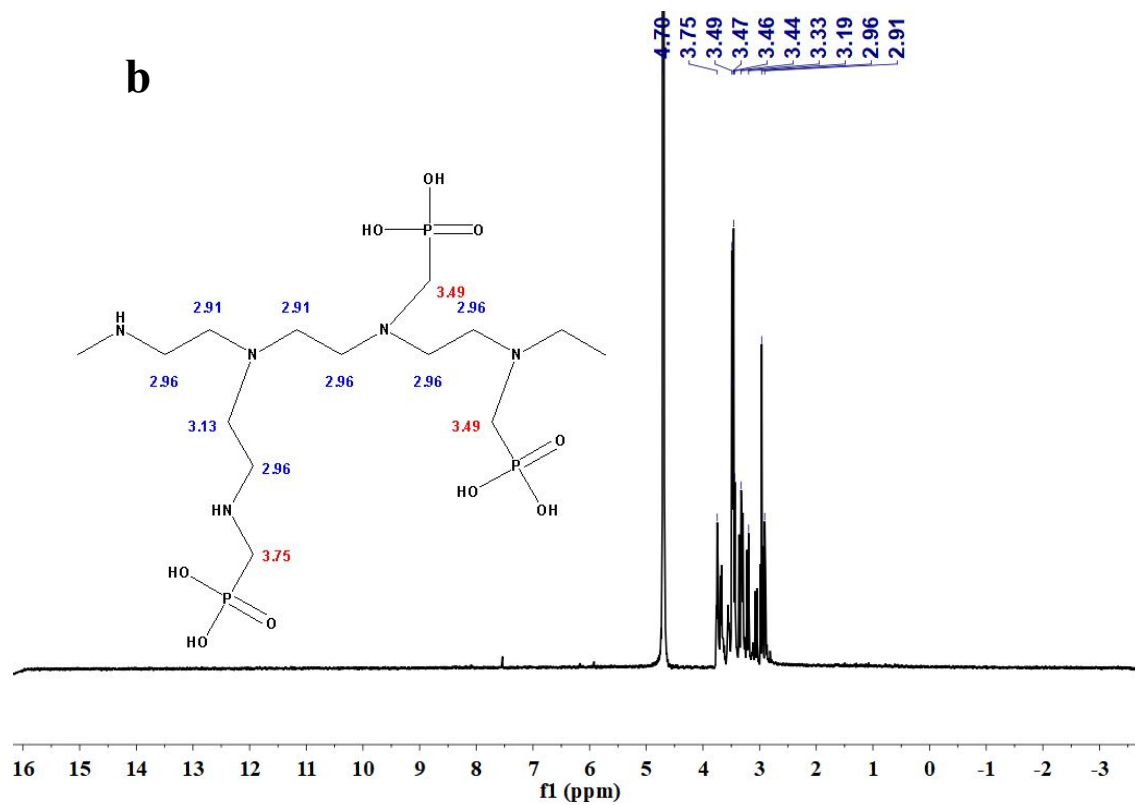

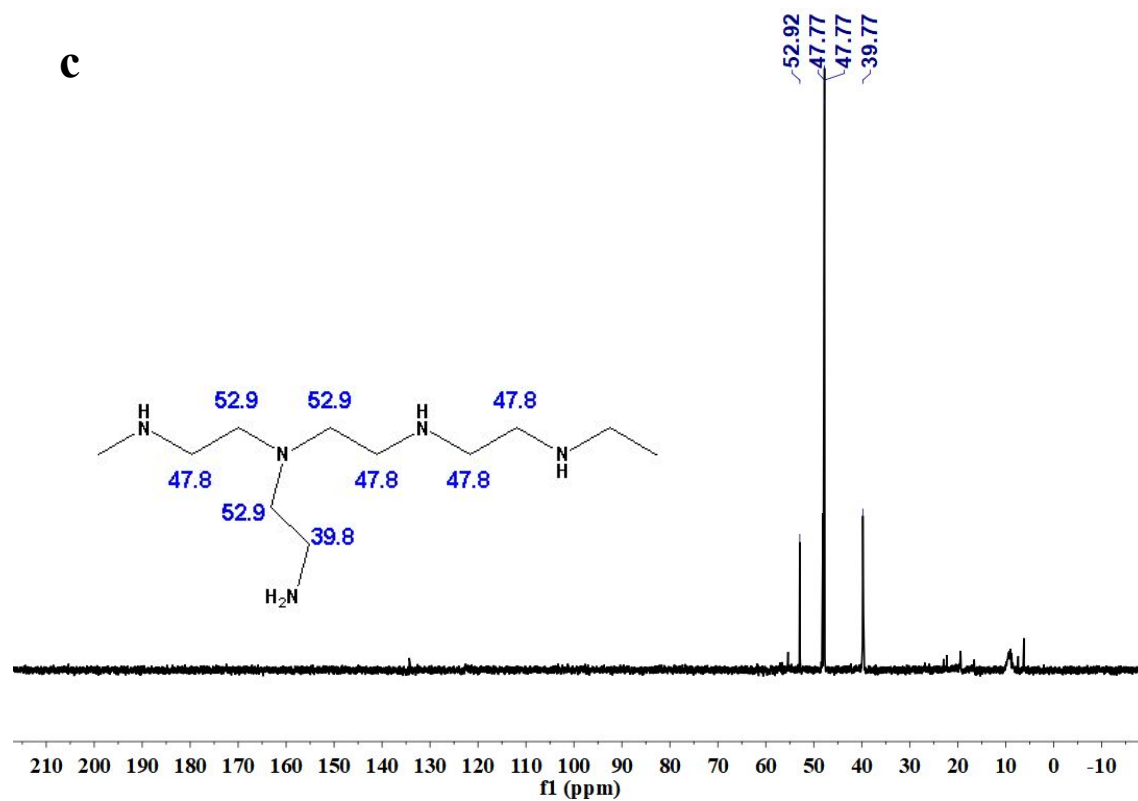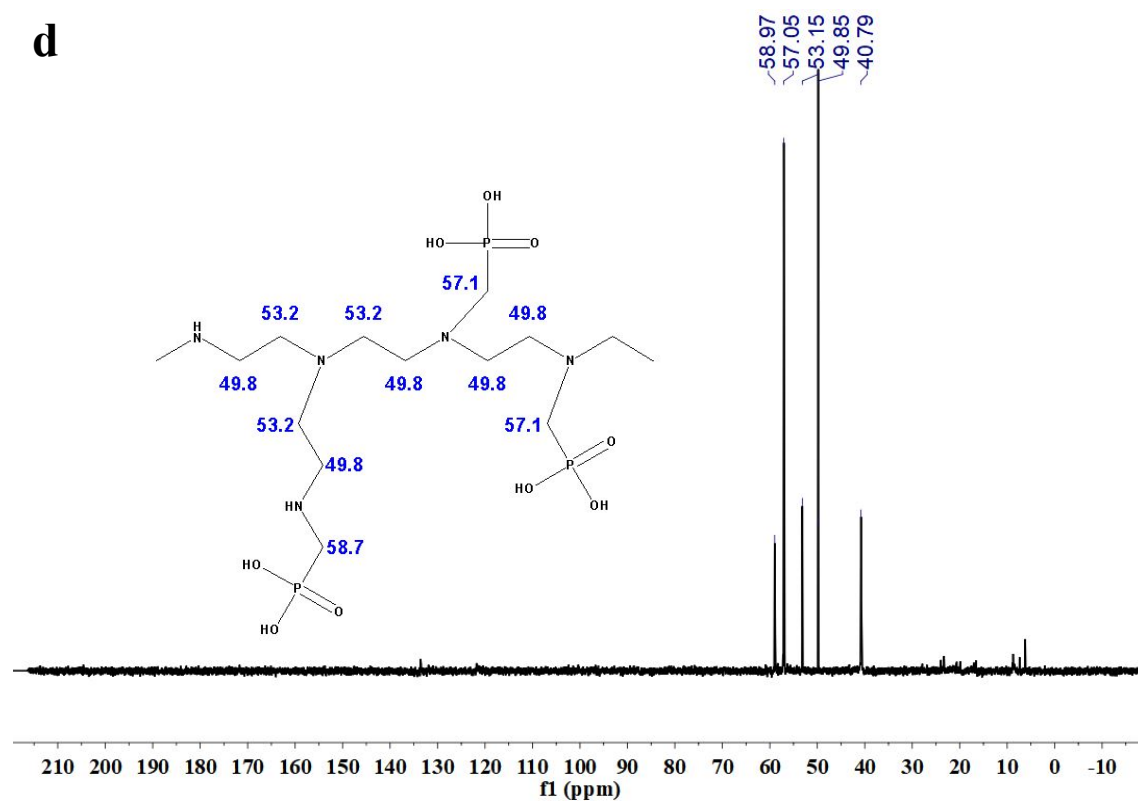

Figure S2  $^1\text{H}$  and  $^{13}\text{C}$  NMR spectrum of the PEI (a,c) and PEIMPA (b,d).

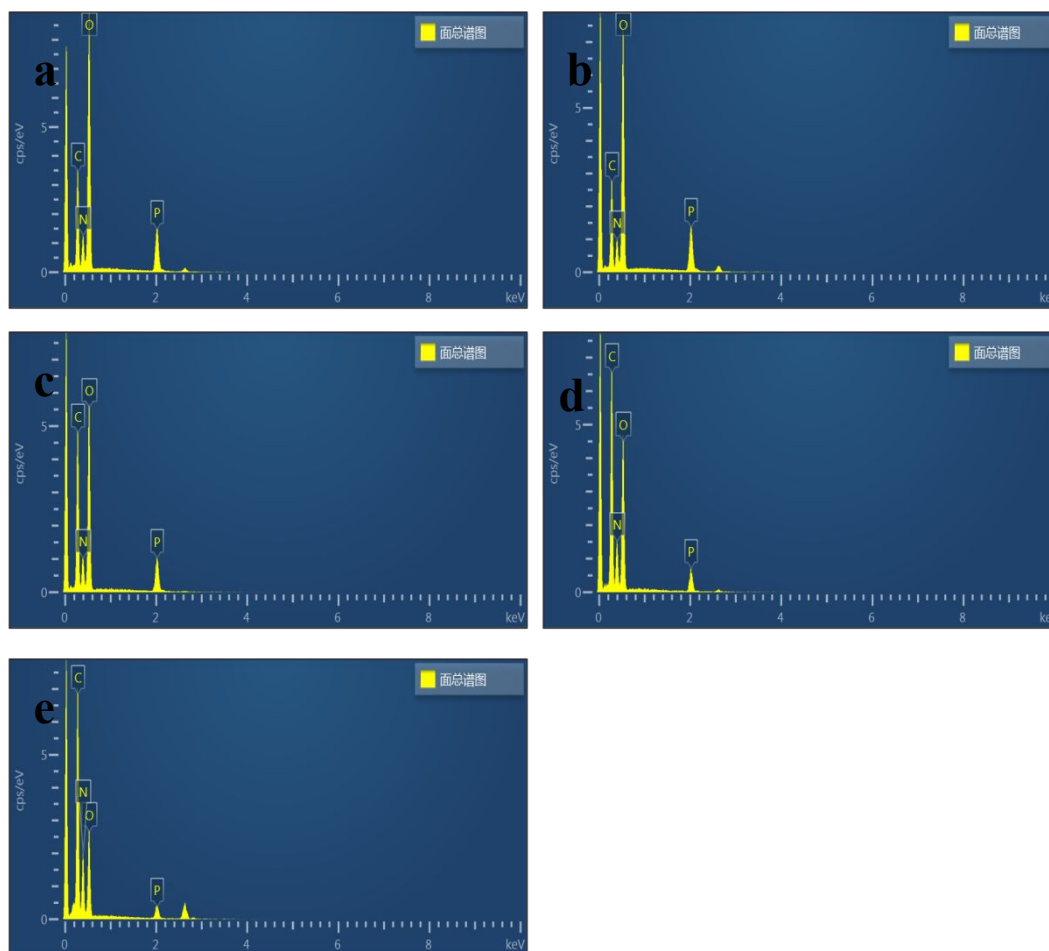

**Figure S3 EDS mapping for PEI and PEIMPA with various replacement rates: (a)PEIMPA-4.5kDa-100, (b)PEIMPA-12kDa-100, (c)PEIMPA-70kDa-100, (d) PEIMPA-70kDa-75, (e)PEIMPA-70kDa-50**

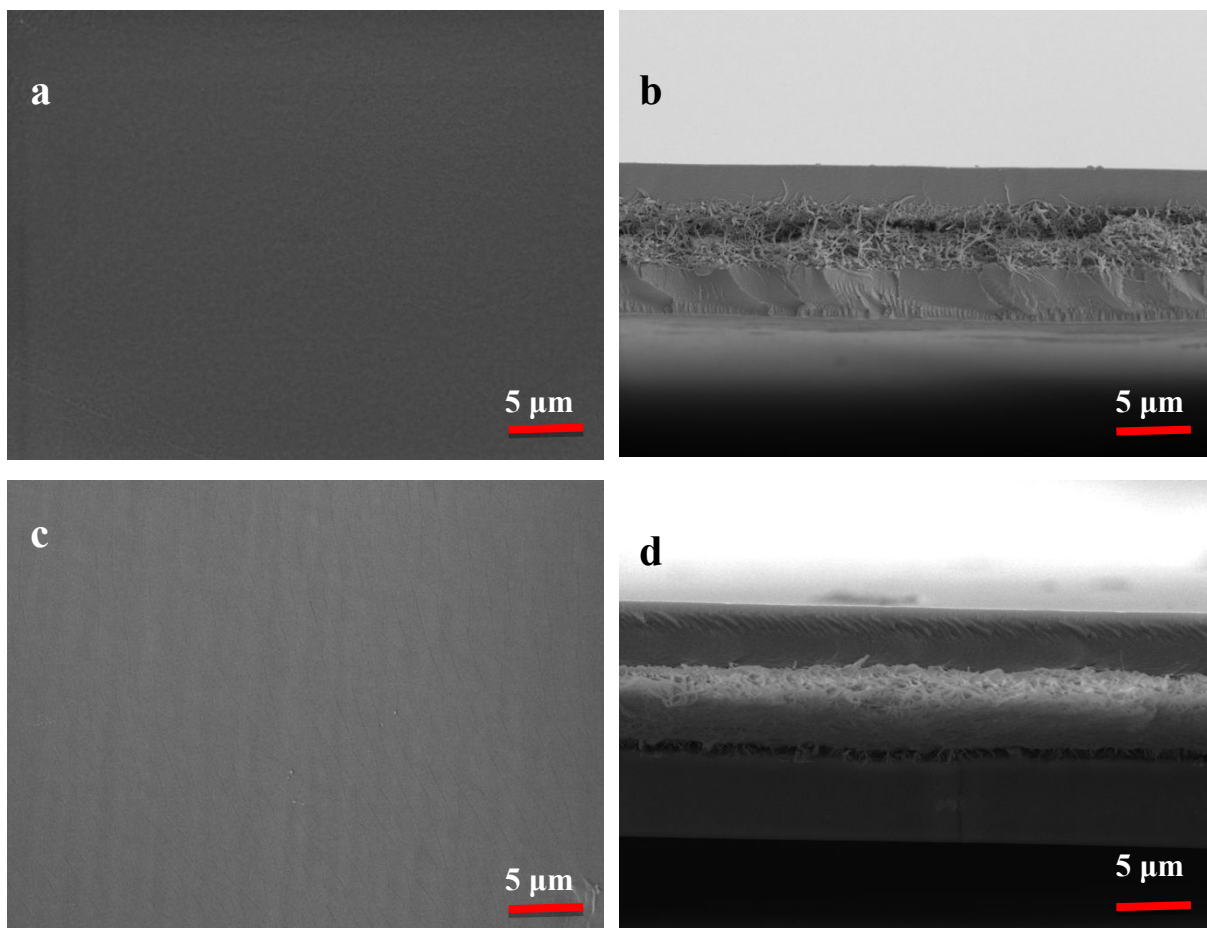

**Figure S4 Surface and cross-sectional SEM image of PFSA/PEIMPA-70kDa-50 (a,b) and PFSA/PEIMPA-70kDa-100 (c,d).**

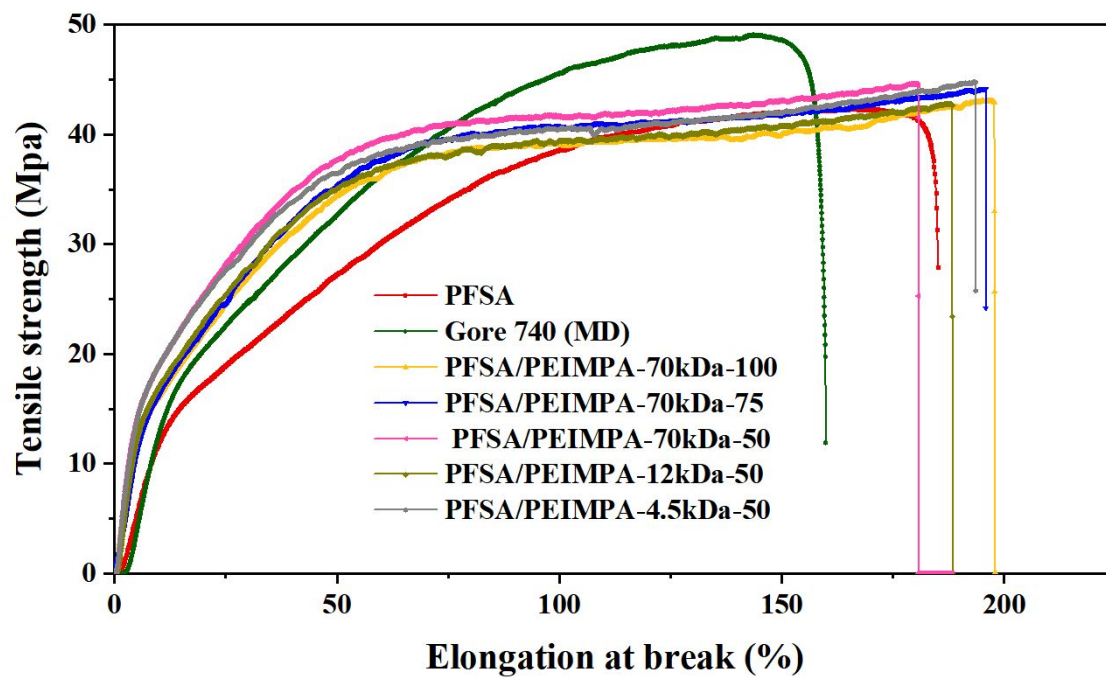

Figure S5 Stress-strain curves of PFSA , Gore 740 and PFSA/PEIMPA composite membranes.



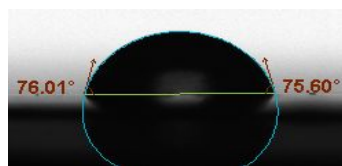

**PFSA**

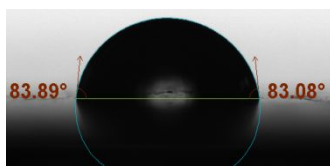

**Gore 740**

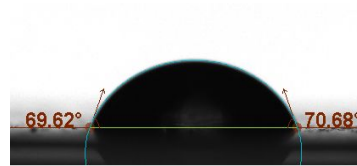

**PFSA/PEIMPA-70kD-50**

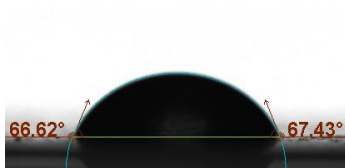

**PFSA/PEIMPA-70kDa-75**

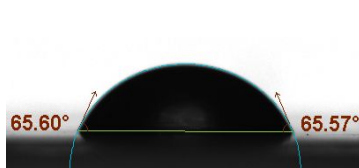

**PFSA/PEIMPA-70kDa-100**

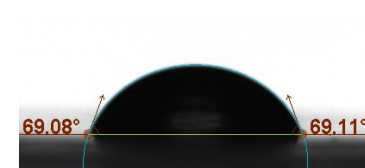

**PFSA/PEIMPA-12kDa-50**

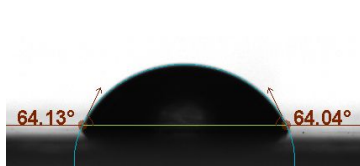

**PFSA/PEIMPA-12kDa-100**

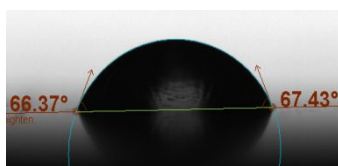

**PFSA/PEIMPA-4.5kDa-50**

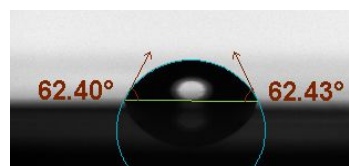

**PFSA/PEIMPA-4.5kDa-100**

**Figure S6 the contact angle image of PFSA, Gore 740 and PFSA/PEIMPA composite membranes.**

**Tab.S1 Element content of PEI and PEIMPA with various replacement rates based on EDS mapping**

|                   | C     | O     | N     | P     |
|-------------------|-------|-------|-------|-------|
| PEI               | 45.27 | 0.03  | 53.69 | 0.01  |
| PEIMPA-4.5kDa-100 | 27.72 | 36.29 | 17.62 | 18.37 |
| PEIMPA-12kDa-100  | 29.64 | 34.24 | 18.44 | 17.68 |
| PEIMPA-70kDa-100  | 30.20 | 26.59 | 26.24 | 16.97 |
| PEIMPA-70kD-75    | 33.07 | 23.21 | 31.16 | 12.56 |
| PEIMPA-70kDa-50   | 38.14 | 13.58 | 39.72 | 8.65  |

**Table S2 Mechanical properties of PFSA,Gore 740 and PFSA/PEIMPA composite membranes**

| Membrane               | Tensile strength<br>( Mpa ) | Elongation at break<br>( % ) | Young's modulus<br>(Mpa) |
|------------------------|-----------------------------|------------------------------|--------------------------|
| PFSA                   | 36.86±2.01                  | 174.6±12.5                   | 220.4±14.83              |
| Gore740                | 50.24±1.84                  | 158.4±13.9                   | 296.2±22.3               |
| PFSA/PEIMPA-70kDa-100  | 39.62±2.15                  | 194.6±23.4                   | 245.5±16.7               |
| PFSA/PEIMPA-70kDa-75   | 41.34±1.58                  | 184.7±26.4                   | 262.7±19.8               |
| PFSA/PEIMPA-70kDa-50   | 43.27±2.34                  | 178.6±19.5                   | 281.3±25.4               |
| PFSA/PEIMPA-12kDa-100  | 39.87±1.43                  | 176.8±21.1                   | 204.3±14.2               |
| PFSA/PEIMPA-4.5kDa-100 | 38.62±1.57                  | 183.42±16.7                  | 187.6±11.4               |

**Table.S3 The water uptake, swelling ratio and water contact angle of the PFSA, Gore 740 and PFSA/PEIMPA composite membranes.**

| membrane    | replacement | Water uptake    | Swelling ratio  | Contact angle    |
|-------------|-------------|-----------------|-----------------|------------------|
|             | rate (%)    | (%)             | (%)             | (°)              |
| PFSA        |             | $38.7 \pm 0.48$ | $3.86 \pm 0.16$ | $76.2 \pm 1.16$  |
| Gore 740    |             | $36.8 \pm 0.16$ | $2.68 \pm 0.12$ | $84.23 \pm 1.29$ |
| PFSA/PEIMPA | 50          | $41.6 \pm 0.72$ | $3.12 \pm 0.17$ | $69.74 \pm 1.56$ |
| -70kDa      | 75          | $44.8 \pm 0.54$ | $3.56 \pm 0.24$ | $67.46 \pm 0.68$ |
|             | 100         | $48.9 \pm 0.39$ | $4.05 \pm 0.20$ | $65.42 \pm 0.58$ |
| PFSA/PEIMPA | 50          | $42.2 \pm 0.87$ | $3.28 \pm 0.13$ | $68.12 \pm 1.35$ |
| -12kDa      | 75          | $45.2 \pm 0.29$ | $3.74 \pm 0.22$ | $66.87 \pm 1.89$ |
|             | 100         | $49.6 \pm 0.52$ | $4.26 \pm 0.31$ | $64.35 \pm 1.74$ |
| PFSA/PEIMPA | 50          | $42.7 \pm 0.72$ | $3.67 \pm 0.29$ | $67.11 \pm 0.94$ |
| -4.5kDa     | 75          | $45.8 \pm 0.37$ | $4.12 \pm 0.17$ | $66.12 \pm 2.05$ |
|             | 100         | $50.3 \pm 0.28$ | $4.65 \pm 0.35$ | $62.55 \pm 1.50$ |
